# Supplementary material for: Global Research Output on Sleep Research in Athletes from 1966 to 2019: A Bibliometric Analysis
Source: Clocks Sleep. 2020 Mar 30;2(2):99–119. doi: 10.3390/clockssleep2020010 (PMC7445811; doi:10.3390/clockssleep2020010)
Supplement: Supplementary file 1 [file clockssleep-02-00010-s001.xlsx]

## Sheet: List of papers
Authors	Title	Year	Source title	DOI
Mah C.D., Sparks A.J., Samaan M.A., Souza R.B., Luke A.	Sleep restriction impairs maximal jump performance and joint coordination in elite athletes	2019	Journal of Sports Sciences	10.1080/02640414.2019.1612504
Driller M.W., Lastella M., Sharp A.P.	Individualized sleep education improves subjective and objective sleep indices in elite cricket athletes: A pilot study	2019	Journal of Sports Sciences	10.1080/02640414.2019.1616900
Biggins M., Purtill H., Fowler P., Bender A., Sullivan K.O., Samuels C., Cahalan R.	Sleep in elite multi-sport athletes: Implications for athlete health and wellbeing	2019	Physical Therapy in Sport	10.1016/j.ptsp.2019.07.006
Saidi O., Doré E., Maso F., Mack-Inocentio D., Walrand S., Pereira B., Duché P.	Acute effect of an intensified exercise program on subsequent sleep, dietary intake, and performance in junior rugby players	2019	European Journal of Applied Physiology	10.1007/s00421-019-04196-5
Bolin D.J.	Sleep Deprivation and Its Contribution to Mood and Performance Deterioration in College Athletes	2019	Current Sports Medicine Reports	10.1249/JSR.0000000000000621
Ali K., Aseem A., Hussain M.E.	Anaerobic training and its effects on sleep quality, state, and trait anxiety in collegiate athletes	2019	Sport Sciences for Health	10.1007/s11332-019-00553-1
Skein M., Harrison T., Clarke D.	Sleep characteristics, sources of perceived stress and coping strategies in adolescent athletes	2019	Journal of Sleep Research	10.1111/jsr.12791
Leduc C., Jones B., Robineau J., Piscione J., Lacome M.	Sleep Quality and Quantity of International Rugby Sevens Players During Pre-season	2019	Journal of strength and conditioning research	10.1519/JSC.0000000000002839
Waddington G.S.	Improving athlete sleep?	2019	Journal of Science and Medicine in Sport	10.1016/j.jsams.2019.05.007
Miles K.H., Clark B., Fowler P.M., Miller J., Pumpa K.L.	Sleep practices implemented by team sport coaches and sports science support staff: A potential avenue to improve athlete sleep?	2019	Journal of Science and Medicine in Sport	10.1016/j.jsams.2019.01.008
Vitale J.A., La Torre A., Banfi G.	If RAR’s acrophase is influenced by the sport discipline, how actigraphy-based sleep parameters vary in triathlon, volleyball and soccer athletes?	2019	Chronobiology International	10.1080/07420528.2019.1594246
Raikes A.C., Athey A., Alfonso-Miller P., Killgore W.D.S., Grandner M.A.	Insomnia and daytime sleepiness: risk factors for sports-related concussion	2019	Sleep Medicine	10.1016/j.sleep.2019.03.008
Kroshus E., Wagner J., Wyrick D., Athey A., Bell L., Benjamin H.J., Grandner M.A., Kline C.E., Mohler J.M., Prichard J.R., Watson N.F., Hainline B.	Wake up call for collegiate athlete sleep: Narrative review and consensus recommendations from the NCAA Interassociation Task Force on Sleep and Wellness	2019	British Journal of Sports Medicine	10.1136/bjsports-2019-100590
Shamloo S., Irandoust K., Afif A.H.	The effect of beetroot juice supplementation on physiological fatigue and quality of sleep in male athletes	2019	Sleep and Hypnosis	10.5350/Sleep.Hypn.2019.21.0176
Whitworth-Turner C.M., Di Michele R., Muir I., Gregson W., Drust B.	Training load and schedule are important determinants of sleep behaviours in youth-soccer players	2019	European Journal of Sport Science	10.1080/17461391.2018.1536171
Gao B., Dwivedi S., Milewski M.D., Cruz A.I.	Lack of Sleep and Sports Injuries in Adolescents: A Systematic Review and Meta-analysis	2019	Journal of Pediatric Orthopaedics	10.1097/BPO.0000000000001306
Dunican I.C., Walsh J., Higgins C.C., Jones M.J., Maddison K., Caldwell J.A., David H., Eastwood P.R.	Prevalence of sleep disorders and sleep problems in an elite super rugby union team	2019	Journal of Sports Sciences	10.1080/02640414.2018.1537092
Jones M.J., Dawson B., Gucciardi D.F., Eastwood P.R., Miller J., Halson S.L., Dunican I.C., Peeling P.	Evening electronic device use and sleep patterns in athletes	2019	Journal of Sports Sciences	10.1080/02640414.2018.1531499
Wada H., Nagata K., Shirahama R., Tajima T., Kimura M., Ikeda A., Maruyama K., Tamura M., Suzuki K., Tanigawa T.	Impact of sleep disordered breathing on performance in judo players	2019	BMJ Open Sport and Exercise Medicine	10.1136/bmjsem-2018-000418
Khalladi K., Farooq A., Souissi S., Herrera C.P., Chamari K., Taylor L., El Massioui F.	Inter-relationship between sleep quality, insomnia and sleep disorders in professional soccer players	2019	BMJ Open Sport and Exercise Medicine	10.1136/bmjsem-2018-000498
Doherty R., Madigan S., Warrington G., Ellis J.	Sleep and nutrition interactions: Implications for athletes	2019	Nutrients	10.3390/nu11040822
Silva M.-R., Paiva T.	Risk factors for precompetitive sleep behavior in elite female athletes	2019	Journal of Sports Medicine and Physical Fitness	10.23736/S0022-4707.18.08498-0
Lastella M., Roach G.D., Halson S.L., Sargent C.	The effects of cold water immersion on the amount and quality of sleep obtained by elite cyclists during a simulated hill climbing tour	2019	Sport Sciences for Health	10.1007/s11332-018-0522-6
Lastella M., Roach G.D., Sargent C.	Travel fatigue and sleep/wake behaviors of professional soccer players during international competition	2019	Sleep Health	10.1016/j.sleh.2018.10.013
Roberts S.S.H., Teo W.-P., Warmington S.A.	Effects of training and competition on the sleep of elite athletes: A systematic review and meta-analysis	2019	British Journal of Sports Medicine	10.1136/bjsports-2018-099322
Douzi W., Dupuy O., Theurot D., Boucard G., Dugué B.	Partial-body cryostimulation after training improves sleep quality in professional soccer players	2019	BMC Research Notes	10.1186/s13104-019-4172-9
Brotherton E.J., Moseley S.E., Langan-Evans C., Pullinger S.A., Robertson C.M., Burniston J.G., Edwards B.J.	Effects of two nights partial sleep deprivation on an evening submaximal weightlifting performance; are 1 h powernaps useful on the day of competition?	2019	Chronobiology International	10.1080/07420528.2018.1552702
Costa J.A., Brito J., Nakamura F.Y., Figueiredo P., Oliveira E., Rebelo A.	Sleep patterns and nocturnal cardiac autonomic activity in female athletes are affected by the timing of exercise and match location	2019	Chronobiology International	10.1080/07420528.2018.1545782
Taheri M., Valayi F.	Aerobic exercise improves attention and quality of sleep among professional volleyball players	2019	Sleep and Hypnosis	10.5350/Sleep.Hypn.2019.21.0174
Bastien C.H., Ellis J.G., Athey A., Chakravorty S., Robbins R., Knowlden A.P., Charest J., Grandner M.A.	Driving after drinking alcohol associated with insufficient sleep and insomnia among student athletes and non-athletes	2019	Brain Sciences	10.3390/brainsci9020046
Iso Y., Kitai H., Kyuno E., Tsunoda F., Nishinaka N., Funato M., Nishimura E., Akihiro S., Tanuma H., Yonechi T., Geshi E., Sambe T., Suzuki H.	Prevalence and significance of sleep disordered breathing in adolescent athletes	2019	ERS Monograph	10.1183/23120541.00029-2019
Kölling S., Duffield R., Erlacher D., Venter R., Halson S.L.	Sleep-related issues for recovery and performance in athletes	2019	International Journal of Sports Physiology and Performance	10.1123/ijspp.2017-0746
Vitale J.A., Banfi G., Galbiati A., Ferini-Strambi L., La Torre A.	Effect of a night game on actigraphy-based sleep quality and perceived recovery in top-level volleyball athletes	2019	International Journal of Sports Physiology and Performance	10.1123/ijspp.2018-0194
Peck B., Renzi T., Peach H., Gaultney J., Marino J.S.	Examination of risk for sleep-disordered breathing among college football players	2019	Journal of Sport Rehabilitation	10.1123/jsr.2017-0127
Daaloul H., Souissi N., Davenne D.	Effects of Napping on Alertness, Cognitive, and Physical Outcomes of Karate Athletes	2019	Medicine and Science in Sports and Exercise	10.1249/MSS.0000000000001786
Blake A.L., McVicar C.L., Retino M., Hall E.E., Ketcham C.J.	Concussion history influences sleep disturbances, symptoms, and quality of life in collegiate student-athletes	2019	Sleep Health	10.1016/j.sleh.2018.10.011
Fitzgerald D., Beckmans C., Joyce D., Mills K.	The influence of sleep and training load on illness in nationally competitive male Australian Football athletes: A cohort study over one season	2019	Journal of Science and Medicine in Sport	10.1016/j.jsams.2018.06.011
Driller M., Cupples B.	Sleep prior to and following competition in professional rugby league athletes	2019	Science and Medicine in Football	10.1080/24733938.2018.1479534
Clemente F.M., Mendes B., Bredt S.D.G.T., Praça G.M., Silvério A., Carriço S., Duarte E.	Perceived Training Load, Muscle Soreness, Stress, Fatigue, and Sleep Quality in Professional Basketball: A Full Season Study	2019	Journal of Human Kinetics	10.2478/hukin-2019-0002
Dunican I.C., Higgin C.C., Murray K., Jones M.J., Dawson B., Caldwell J.A., Halson S.L., Eastwood P.R.	Sleep Patterns and Alertness in an Elite Super Rugby Team During a Game Week	2019	Journal of Human Kinetics	10.2478/hukin-2018-0088
Vitale K.C., Owens R., Hopkins S.R., Malhotra A.	Sleep Hygiene for Optimizing Recovery in Athletes: Review and Recommendations	2019	International Journal of Sports Medicine	10.1055/a-0905-3103
Hrozanova M., Moen F., Pallesen S.	Unique predictors of sleep quality in junior athletes: The protective function of mental resilience, and the detrimental impact of sex, worry and perceived stress	2019	Frontiers in Psychology	10.3389/fpsyg.2019.01256
Chandrasekaran B., Fernandes S., Davis F.	Science of sleep and sports performance – a scoping review [Science du sommeil et performance sportive]	2019	Science and Sports	10.1016/j.scispo.2019.03.006
Cooper K.B., Wilson M.R., Jones M.I.	The Impact of Sleep on Mental Toughness: Evidence From Observational and N-of-1 Manipulation Studies in Athletes	2019	Sport, Exercise, and Performance Psychology	10.1037/spy0000174
Chung J.S., Zynda A.J., Didehbani N., Hicks C., Hynan L.S., Miller S.M., Bell K.R., Cullum C.M.	Association Between Sleep Quality and Recovery Following Sport-Related Concussion in Pediatrics	2019	Journal of Child Neurology	10.1177/0883073819849741
Trabelsi K., Bragazzi N., Zlitni S., Khacharem A., Boukhris O., El-Abed K., Ammar A., Khanfir S., Shephard R.J., Hakim A., Moalla W., Chtourou H.	Observing Ramadan and sleep-wake patterns in athletes: A systematic review, meta-analysis and meta-regression	2019	British Journal of Sports Medicine	10.1136/bjsports-2018-099898
Halson S.L.	Sleep Monitoring in Athletes: Motivation, Methods, Miscalculations and Why it Matters	2019	Sports Medicine	10.1007/s40279-019-01119-4
Yasuda J., Yoshizaki T., Yamamoto K., Yoshino M., Ota M., Kawahara T., Kamei A.	Association of frequency of milk or dairy product consumption with subjective sleep quality during training periods in Japanese elite athletes: A cross-sectional study	2019	Journal of Nutritional Science and Vitaminology	10.3177/jnsv.65.177
Daniel N.V.S., Zimberg I.Z., Estadella D., Garcia M.C., Padovani R.C., Juzwiak C.R.	Effect of the intake of high or low glycemic index high carbohydrate-meals on athletes’ sleep quality in pre-game nights	2019	Anais da Academia Brasileira de Ciencias	10.1590/0001-3765201920180107
Sekiguchi Y., Adams W.M., Benjamin C.L., Curtis R.M., Giersch G.E.W., Casa D.J.	Relationships between resting heart rate, heart rate variability and sleep characteristics among female collegiate cross-country athletes	2019	Journal of Sleep Research	10.1111/jsr.12836
Suppiah H.T., Low C.Y., Choong G., Chia M.	Effects of a short daytime nap on shooting and sprint performance in high-level adolescent athletes	2019	International Journal of Sports Physiology and Performance	10.1123/ijspp.2018-0107
Taheri M., Irandoust K.	Morning exercise improves cognitive performance decrements induced by partial sleep deprivation in elite athletes	2019	Biological Rhythm Research	10.1080/09291016.2019.1576279
Corona J.A.A., Núñez T.M., Ugalde A.B., Gutiérrez R.E., Millán E.M.A.	Sleep deprivation does not affect aerobic resistance or blood lactate concentration of young athletes [La privación de sueño no afecta la resistencia aeróbica ni la concentración de lactato en sangre de jóvenes deportistas]	2019	Retos
Claudino J.G., Gabbet T.J., De Sá Souza H., Simim M., Fowler P., De Alcantara Borba D., Melo M., Bottino A., Loturco I., D'Almeida V., Carlos Amadio A., Cerca Serrão J., Nassis G.P.	Which parameters to use for sleep quality monitoring in team sport athletes? A systematic review and meta-analysis	2019	BMJ Open Sport and Exercise Medicine	10.1136/bmjsem-2018-000475
Qin P., Dick B.D., Leung A., Brown C.A.	Effectiveness of hand self-shiatsu to improve sleep following sport-related concussion in young athletes: a proof-of-concept study	2019	Journal of integrative medicine	10.1016/j.joim.2018.11.002
Nedelec M., Dawson B., Dupont G.	Influence of Night Soccer Matches on Sleep in Elite Players	2019	Journal of Strength and Conditioning Research	10.1519/JSC.0000000000002906
Antonino Vitale J., Devetag F., Colnago S., La Torre A.	Effect of mattress on actigraphy-based sleep quality and perceived recovery in top-level athletes: a randomized, double-blind, controlled trial	2019	Biological Rhythm Research	10.1080/09291016.2018.1490864
Hoshikawa M., Uchida S., Hirano Y.	A Subjective Assessment of the Prevalence and Factors Associated with Poor Sleep Quality Amongst Elite Japanese Athletes	2018	Sports Medicine - Open	10.1186/s40798-018-0122-7
Vitale J.A., Banfi G., La Torre A., Bonato M.	Effect of a habitual late-evening physical task on sleep quality in neither-type soccer players	2018	Frontiers in Physiology	10.3389/fphys.2018.01582
Sawczuk T., Jones B., Scantlebury S., Till K.	The influence of training load, exposure to match play and sleep duration on daily wellbeing measures in youth athletes	2018	Journal of Sports Sciences	10.1080/02640414.2018.1461337
Ehrlenspiel F., Erlacher D., Ziegler M.	Changes in Subjective Sleep Quality Before a Competition and Their Relation to Competitive Anxiety	2018	Behavioral Sleep Medicine	10.1080/15402002.2016.1253012
Zandonai T., Lugoboni F., Zamboni L.	A risk for athletes: when the desire to sleep becomes a nightmare. A brief case report on benzodiazepine addiction	2018	Psychopharmacology	10.1007/s00213-018-5047-9
O'Donnell S., Beaven C.M., Driller M.	The influence of match-day napping in elite female netball athletes	2018	International Journal of Sports Physiology and Performance	10.1123/ijspp.2017-0793
Sufrinko A.M., Howie E.K., Elbin R.J., Collins M.W., Kontos A.P.	A Preliminary Investigation of Accelerometer-Derived Sleep and Physical Activity Following Sport-Related Concussion	2018	The Journal of head trauma rehabilitation	10.1097/HTR.0000000000000387
Rosa J.P.P., Silva A., Rodrigues D.F., Simim M.A., Narciso F.V., Tufik S., Bichara J.J., Pereira S.R.D., Da Silva S.C., de Mello M.T.	Effect of bright light therapy on delayed sleep/wake cycle and reaction time of athletes participating in the Rio 2016 Olympic Games	2018	Chronobiology International	10.1080/07420528.2018.1459660
Juliff L.E., Peiffer J.J., Halson S.L.	Night games and sleep: Physiological, neuroendocrine, and psychometric mechanisms	2018	International Journal of Sports Physiology and Performance	10.1123/ijspp.2016-0809
Sawczuk T., Jones B., Scantlebury S., Till K.	Relationships between training load, sleep duration, and daily well-being and recovery measures in youth athletes	2018	Pediatric Exercise Science	10.1123/pes.2017-0190
Caia J., Scott T.J., Halson S.L., Kelly V.G.	The influence of sleep hygiene education on sleep in professional rugby league athletes	2018	Sleep Health	10.1016/j.sleh.2018.05.002
O’Donnell S., Beaven C.M., Driller M.	Sleep/wake behavior prior to and following competition in elite female netball athletes	2018	Sport Sciences for Health	10.1007/s11332-017-0425-y
Thornton H.R., Miller J., Taylor L., Sargent C., Lastella M., Fowler P.M.	Impact of short- compared to long-haul international travel on the sleep and wellbeing of national wheelchair basketball athletes	2018	Journal of Sports Sciences	10.1080/02640414.2017.1398883
Caia J., Thornton H.R., Kelly V.G., Scott T.J., Halson S.L., Cupples B., Driller M.W.	Does self-perceived sleep reflect sleep estimated via activity monitors in professional rugby league athletes?	2018	Journal of Sports Sciences	10.1080/02640414.2017.1398885
Petit E., Bourdin H., Tio G., Yenil O., Haffen E., Mougin F.	Effects of a 20-Min Nap Post Normal and Jet Lag Conditions on P300 Components in Athletes	2018	International Journal of Sports Medicine	10.1055/a-0599-0888
Li C., Ivarsson A., Stenling A., Wu Y.	The dynamic interplay between burnout and sleep among elite blind soccer players	2018	Psychology of Sport and Exercise	10.1016/j.psychsport.2017.08.008
Romyn G., Lastella M., Miller D.J., Versey N.G., Roach G.D., Sargent C.	Daytime naps can be used to supplement night-time sleep in athletes	2018	Chronobiology International	10.1080/07420528.2018.1466795
Lastella M., Roach G.D., Miller D.J., Versey N., Romyn G., Sargent C.	Athletes underestimate sleep quantity during daytime nap opportunities	2018	Chronobiology International	10.1080/07420528.2018.1466787
Sargent C., Lastella M., Romyn G., Versey N., Miller D.J., Roach G.D.	How well does a commercially available wearable device measure sleep in young athletes?	2018	Chronobiology International	10.1080/07420528.2018.1466800
Mah C.D., Kezirian E.J., Marcello B.M., Dement W.C.	Poor sleep quality and insufficient sleep of a collegiate student-athlete population	2018	Sleep Health	10.1016/j.sleh.2018.02.005
Cheikh M., Hammouda O., Gaamouri N., Driss T., Chamari K., Cheikh R.B., Dogui M., Souissi N.	Melatonin ingestion after exhaustive late-evening exercise improves sleep quality and quantity, and short-term performances in teenage athletes	2018	Chronobiology International	10.1080/07420528.2018.1474891
O’Donnell S., Bird S., Jacobson G., Driller M.	Sleep and stress hormone responses to training and competition in elite female athletes	2018	European Journal of Sport Science	10.1080/17461391.2018.1439535
Trabelsi K., Stannard S.R., Chtourou H., Moalla W., Ghozzi H., Jamoussi K., Hakim A.	Monitoring athletes’ hydration status and sleep patterns during Ramadan observance: methodological and practical considerations	2018	Biological Rhythm Research	10.1080/09291016.2017.1368214
Costa J.A., Brito J., Nakamura F.Y., Oliveira E.M., Rebelo A.N.	Effects of late-night training on "slow-wave sleep episode" and hour-by-hour-derived nocturnal cardiac autonomic activity in female soccer players	2018	International Journal of Sports Physiology and Performance	10.1123/ijspp.2017-0681
Beltran-Valls M.R., Artero E.G., Capdevila-Seder A., Legaz-Arrese A., Adelantado-Renau M., Moliner-Urdiales D.	Regular practice of competitive sports does not impair sleep in adolescents: DADOS study	2018	Pediatric Exercise Science	10.1123/pes.2017-0129
Howell D.R., Berkstresser B., Wang F., Buckley T.A., Mannix R., Stillman A., Meehan W.P., III	Self-reported sleep duration affects tandem gait, but not steady-state gait outcomes among healthy collegiate athletes	2018	Gait and Posture	10.1016/j.gaitpost.2018.03.038
Murdaugh D.L., Ono K.E., Reisner A., Burns T.G.	Assessment of Sleep Quantity and Sleep Disturbances During Recovery From Sports-Related Concussion in Youth Athletes	2018	Archives of Physical Medicine and Rehabilitation	10.1016/j.apmr.2018.01.005
Watson A., Brickson S.	Impaired Sleep Mediates the Negative Effects of Training Load on Subjective Well-Being in Female Youth Athletes	2018	Sports Health	10.1177/1941738118757422
Lastella M., Vincent G.E., Duffield R., Roach G.D., Halson S.L., Heales L.J., Sargent C.	Can sleep be used as an indicator of overreaching and overtraining in athletes?	2018	Frontiers in Physiology	10.3389/fphys.2018.00436
Dunican I.C., Higgins C.C., Jones M.J., Clarke M.W., Murray K., Dawson B., Caldwell J.A., Halson S.L., Eastwood P.R.	Caffeine use in a Super Rugby game and its relationship to post-game sleep	2018	European Journal of Sport Science	10.1080/17461391.2018.1433238
Li C., Kee Y.H., Lam L.S.	Effect of brief mindfulness induction on university athletes' sleep quality following night training	2018	Frontiers in Psychology	10.3389/fpsyg.2018.00508
Pujalte G.G.A., Benjamin H.J.	Sleep and the athlete	2018	Current Sports Medicine Reports	10.1249/JSR.0000000000000468
Arbinaga F.	Self-Reported Perceptions of Sleep Quality and Resilience Among Dance Students	2018	Perceptual and Motor Skills	10.1177/0031512518757352
Monma T., Ando A., Asanuma T., Yoshitake Y., Yoshida G., Miyazawa T., Ebine N., Takeda S., Omi N., Satoh M., Tokuyama K., Takeda F.	Sleep disorder risk factors among student athletes	2018	Sleep Medicine	10.1016/j.sleep.2017.11.1130
Estivill-Domènech C., Galilea B., Rodríguez-Morilla B., de Yzaguirre I., Estivill E., López E., Zamora M.A., Madrid J.A., Segarra F.	Do elite athletes sleep well? [¿Duermen bien los deportistas de élite?]	2018	Apunts Medicina de l'Esport	10.1016/j.apunts.2017.10.002
Knufinke M., Nieuwenhuys A., Geurts S.A.E., Møst E.I.S., Maase K., Moen M.H., Coenen A.M.L., Kompier M.A.J.	Train hard, sleep well? Perceived training load, sleep quantity and sleep stage distribution in elite level athletes	2018	Journal of Science and Medicine in Sport	10.1016/j.jsams.2017.07.003
Selmi O., Ouerghi N., Khalifa W.B., Jebabli N., Feki M., Bouassida A.	Influence of stress, fatigue, sleep and delayed onset muscle soreness on perceived physical enjoyment exertion during small sided games	2018	Iranian Journal of Public Health
Bonnar D., Bartel K., Kakoschke N., Lang C.	Sleep Interventions Designed to Improve Athletic Performance and Recovery: A Systematic Review of Current Approaches	2018	Sports Medicine	10.1007/s40279-017-0832-x
Thornton H.R., Delaney J.A., Duthie G.M., Dascombe B.J.	Effects of preseason training on the sleep characteristics of professional rugby league players	2018	International Journal of Sports Physiology and Performance	10.1123/ijspp.2017-0119
Knufinke M., Nieuwenhuys A., Geurts S.A.E., Coenen A.M.L., Kompier M.A.J.	Self-reported sleep quantity, quality and sleep hygiene in elite athletes	2018	Journal of Sleep Research	10.1111/jsr.12509
Jones M.J., Peeling P., Dawson B., Halson S., Miller J., Dunican I., Clarke M., Goodman C., Eastwood P.	Evening electronic device use: The effects on alertness, sleep and next-day physical performance in athletes	2018	Journal of Sports Sciences	10.1080/02640414.2017.1287936
Carriço S., Skorski S., Duffield R., Mendes B., Calvete F., Meyer T.	Post-match sleeping behavior based on match scheduling over a season in elite football players	2018	Science and Medicine in Football	10.1080/24733938.2017.1403036
Whitworth-Turner C., Di Michele R., Muir I., Gregson W., Drust B.	A comparison of sleep patterns in youth soccer players and non-athletes	2018	Science and Medicine in Football	10.1080/24733938.2017.1366040
Biggins M., Cahalan R., Comyns T., Purtill H., O’Sullivan K.	Poor sleep is related to lower general health, increased stress and increased confusion in elite Gaelic athletes	2018	Physician and Sportsmedicine	10.1080/00913847.2018.1416258
Andrade A., Bevilacqua G., Casagrande P., Brandt R., Coimbra D.	Sleep quality associated with mood in elite athletes	2018	Physician and Sportsmedicine	10.1080/00913847.2018.1553467
O’donnell S., Beaven C.M., Driller M.W.	From pillow to podium: A review on understanding sleep for elite athletes	2018	Nature and Science of Sleep	10.2147/NSS.S158598
Knufinke M., Fittkau-Koch L., Møst E.I.S., Kompier M.A.J., Nieuwenhuys A.	Restricting short-wavelength light in the evening to improve sleep in recreational athletes–A pilot study	2018	European Journal of Sport Science	10.1080/17461391.2018.1544278
Knufinke M., Nieuwenhuys A., Maase K., Moen M.H., Geurts S.A.E., Coenen A.M.L., Kompier M.A.J.	Effects of natural between-days variation in sleep on elite athletes’ psychomotor vigilance and sport-specific measures of performance	2018	Journal of Sports Science and Medicine
Mehdifar F., Badami R., Meshkati Z.	The effect of fragrances of lavender on the quality of sleep, mood, team cohesion and performance of women volleyball players	2018	Journal of Medicinal Plants
Hoshino F., Omori G., Masnima I.	Nutritional intakes and sleep quality in female university athletes	2018	Japanese Pharmacology and Therapeutics
Driller M.W., Mah C.D., Halson S.L.	Development of the athlete sleep behavior questionnaire: A tool for identifying maladaptive sleep practices in elite athletes	2018	Sleep Science	10.5935/1984-0063.20180009
Juliff L.E., Halson S.L., Hebert J.J., Forsyth P.L., Peiffer J.J.	Longer sleep durations are positively associated with finishing place during a national multiday netball competition	2018	Journal of Strength and Conditioning Research
Lalor B.J., Halson S.L., Tran J., Kemp J.G., Cormack S.J.	No compromise of competition sleep compared with habitual sleep in elite australian footballers	2018	International Journal of Sports Physiology and Performance	10.1123/ijspp.2016-0776
Mutsuzaki H., Tsunoda K., Hotta K., Yozu A., Shimizu Y., Wadano Y.	Comparison of sleep status among three Japanese national wheelchair basketball teams	2018	Journal of Physical Therapy Science	10.1589/jpts.30.63
Drew M., Vlahovich N., Hughes D., Appaneal R., Burke L.M., Lundy B., Rogers M., Toomey M., Watts D., Lovell G., Praet S., Halson S.L., Colbey C., Manzanero S., Welvaert M., West N.P., Pyne D.B., Waddington G.	Prevalence of illness, poor mental health and sleep quality and low energy availability prior to the 2016 summer Olympic games	2018	British Journal of Sports Medicine	10.1136/bjsports-2017-098208
Choi Y., Sadamune R., Nakamura Y., Suita M., Miyakawa S., Maeda S.	The effect of sleep on motor skill learning in young badminton players aged 6–9 years	2018	Sleep and Biological Rhythms	10.1007/s41105-017-0136-4
Baird M.B., Asif I.M.	Medications for Sleep Schedule Adjustments in Athletes	2018	Sports Health	10.1177/1941738117743205
Miller D.J., Sargent C., Vincent G.E., Roach G.D., Halson S.L., Lastella M.	Sleep/wake behaviours in elite athletes from three different football codes	2017	Journal of Sports Science and Medicine
Fowler P.M., Knez W., Crowcroft S., Mendham A.E., Miller J., Sargent C., Halson S., Duffield R.	Greater Effect of East versus West Travel on Jet Lag, Sleep, and Team Sport Performance	2017	Medicine and Science in Sports and Exercise	10.1249/MSS.0000000000001374
Kölling S., Treff G., Winkert K., Ferrauti A., Meyer T., Pfeiffer M., Kellmann M.	The effect of westward travel across five time zones on sleep and subjective jet-lag ratings in athletes before and during the 2015’s World Rowing Junior Championships	2017	Journal of Sports Sciences	10.1080/02640414.2016.1265141
Watson A.M.	Sleep and Athletic Performance	2017	Current Sports Medicine Reports	10.1249/JSR.0000000000000418
Dunican I.C., Eastwood P.R.	Sleep is an important factor when considering rugby union player load	2017	British Journal of Sports Medicine	10.1136/bjsports-2016-097122
von Rosen P., Frohm A., Kottorp A., Fridén C., Heijne A.	Too little sleep and an unhealthy diet could increase the risk of sustaining a new injury in adolescent elite athletes	2017	Scandinavian Journal of Medicine and Science in Sports	10.1111/sms.12735
Caia J., Halson S.L., Scott T.J., Kelly V.G.	Intra-individual variability in the sleep of senior and junior rugby league athletes during the competitive season	2017	Chronobiology International	10.1080/07420528.2017.1358736
Whitworth-Turner C., Di Michele R., Muir I., Gregson W., Drust B.	A shower before bedtime may improve the sleep onset latency of youth soccer players	2017	European Journal of Sport Science	10.1080/17461391.2017.1346147
Fowler P.M., Paul D.J., Tomazoli G., Farooq A., Akenhead R., Taylor L.	Evidence of sub-optimal sleep in adolescent Middle Eastern academy soccer players which is exacerbated by sleep intermission proximal to dawn†	2017	European Journal of Sport Science	10.1080/17461391.2017.1341553
Kim J.H., Hollowed C., Irwin-Weyant M., Patel K., Hosny K., Aida H., Gowani Z., Sher S., Gleason P., Shoop J.L., Galante A., Clark C., Ko Y.-A., Quyyumi A.A., Collop N.A., Baggish A.L.	Sleep-Disordered Breathing and Cardiovascular Correlates in College Football Players	2017	American Journal of Cardiology	10.1016/j.amjcard.2017.07.030
Dunican I.C., Martin D.T., Halson S.L., Reale R.J., Dawson B.T., Caldwell J.A., Jones M.J., Eastwood P.R.	The effects of the removal of electronic devices for 48 hours on sleep in elite judo athletes	2017	Journal of Strength and Conditioning Research	10.1519/JSC.0000000000001697
Stracciolini A., Stein C.J., Kinney S., McCrystal T., Pepin M.J., Meehan Iii W.P.	Associations Between Sedentary Behaviors, Sleep Patterns, and BMI in Young Dancers Attending a Summer Intensive Dance Training Program	2017	Journal of dance medicine & science : official publication of the International Association for Dance Medicine & Science	10.12678/1089-313X.21.3.102
Caia J., Scott T.J., Halson S.L., Kelly V.G.	Do players and staff sleep more during the pre- or competitive season of elite rugby league?	2017	European Journal of Sport Science	10.1080/17461391.2017.1335348
Di Cagno A., Minganti C., Quaranta F., Pistone E.M., Fagnani F., Fiorilli G., Giombini A.	Effectiveness of a new cervical pillow on pain and sleep quality in recreational athletes with chronic mechanical neck pain: A preliminary comparative study	2017	Journal of Sports Medicine and Physical Fitness	10.23736/S0022-4707.16.06587-7
Thornton H.R., Duthie G.M., Pitchford N.W., Delaney J.A., Benton D.T., Dascombe B.J.	Effects of a 2-week high-intensity training camp on sleep activity of professional rugby league athletes	2017	International Journal of Sports Physiology and Performance	10.1123/ijspp.2016-0414
Pallesen S., Gundersen H.S., Kristoffersen M., Bjorvatn B., Thun E., Harris A.	The Effects of Sleep Deprivation on Soccer Skills	2017	Perceptual and Motor Skills	10.1177/0031512517707412
Driller M.W., Dixon Z.T., Clark M.I.	Accelerometer-based sleep behavior and activity levels in student athletes in comparison to student non-athletes	2017	Sport Sciences for Health	10.1007/s11332-017-0373-6
Malhotra R.K.	Sleep, Recovery, and Performance in Sports	2017	Neurologic Clinics	10.1016/j.ncl.2017.03.002
Fuller K.L., Juliff L., Gore C.J., Peiffer J.J., Halson S.L.	Software thresholds alter the bias of actigraphy for monitoring sleep in team-sport athletes	2017	Journal of Science and Medicine in Sport	10.1016/j.jsams.2016.11.021
Staunton C., Gordon B., Custovic E., Stanger J., Kingsley M.	Sleep patterns and match performance in elite Australian basketball athletes	2017	Journal of Science and Medicine in Sport	10.1016/j.jsams.2016.11.016
Killer S.C., Svendsen I.S., Jeukendrup A.E., Gleeson M.	Evidence of disturbed sleep and mood state in well-trained athletes during short-term intensified training with and without a high carbohydrate nutritional intervention	2017	Journal of Sports Sciences	10.1080/02640414.2015.1085589
Bender A.M., Samuels C.H.	Comment on: “Does Elite Sport Degrade Sleep Quality? A Systematic Review”	2017	Sports Medicine	10.1007/s40279-017-0712-4
Gupta L., Morgan K., Gilchrist S.	Author’s Reply to Bender and Samuels “Does Elite Sport Degrade Sleep Quality? A Systematic Review”	2017	Sports Medicine	10.1007/s40279-017-0710-6
Rodrigues D.F., Silva A., Rosa J.P.P., Ruiz F.S., Veríssimo A.W., Winckler C., Rocha E.A.D., Parsons A., Tufik S., Mello M.T.D.	Profiles of mood states, depression, sleep quality, sleepiness, and anxiety of the Paralympic athletics team: A longitudinal study [Perfiles de los estados de ánimo, depresión, calidad de sueño, somnolencia y ansiedad del equipo de atletismo paralímpico: un estudio longitudinal]	2017	Apunts Medicina de l'Esport	10.1016/j.apunts.2016.11.002
Gupta L., Morgan K., Gilchrist S.	Does Elite Sport Degrade Sleep Quality? A Systematic Review	2017	Sports Medicine	10.1007/s40279-016-0650-6
Harris A., Gundersen H., Andreassen P.M., Thun E., Bjorvatn B., Pallesen S.	A comparative study of sleep and mood between young elite athletes and age-matched controls	2017	Journal of Physical Activity and Health	10.1123/jpah.2016-0513
Cheikh R.B., Latiri I., Dogui M., Saad H.B.	Effects of one-night sleep deprivation on selective attention and isometric force in adolescent karate athletes	2017	Journal of Sports Medicine and Physical Fitness	10.23736/S0022-4707.16.06323-4
Tuomilehto H., Vuorinen V.-P., Penttilä E., Kivimäki M., Vuorenmaa M., Venojärvi M., Airaksinen O., Pihlajamäki J.	Sleep of professional athletes: Underexploited potential to improve health and performance	2017	Journal of Sports Sciences	10.1080/02640414.2016.1184300
Brandt R., Bevilacqua G.G., Andrade A.	Perceived Sleep Quality, Mood States, and Their Relationship with Performance among Brazilian Elite Athletes during a Competitive Period	2017	Journal of Strength and Conditioning Research	10.1519/JSC.0000000000001551
dos Passos M.H.P., Silva H.A., Pitangui A.C.R., Oliveira V.M.A., Gomes G.C., Araújo R.C.	Association between sleep quality and pain in the cervical region and scapular waist in adolescent athletes	2017	Sleep and Biological Rhythms	10.1007/s41105-017-0093-y
Ordóñez F.M., Oliver A.J.S., Bastos P.C., Guillén L.S., Domínguez R.	Sleep improvement in athletes: Use of nutritional supplements [Mejora del sueño en deportistas: Uso de suplementos nutricionales]	2017	Archivos de Medicina del Deporte
Copenhaver E.A., Diamond A.B.	The value of sleep on athletic performance, injury, and recovery in the young athlete	2017	Pediatric Annals	10.3928/19382359-20170221-01
Simpson N.S., Gibbs E.L., Matheson G.O.	Optimizing sleep to maximize performance: implications and recommendations for elite athletes	2017	Scandinavian Journal of Medicine and Science in Sports	10.1111/sms.12703
Vitale J.A., Bonato M., Galasso L., La Torre A., Merati G., Montaruli A., Roveda E., Carandente F.	Sleep quality and high intensity interval training at two different times of day: A crossover study on the influence of the chronotype in male collegiate soccer players	2017	Chronobiology International	10.1080/07420528.2016.1256301
Van Ryswyk E., Weeks R., Bandick L., O’Keefe M., Vakulin A., Catcheside P., Barger L., Potter A., Poulos N., Wallace J., Antic N.A.	A novel sleep optimisation programme to improve athletes’ well-being and performance	2017	European Journal of Sport Science	10.1080/17461391.2016.1221470
Li C., Wu Y., Wang X., Tang M., Suppiah H.T.	Sleep characteristics of elite blind soccer players in China	2017	Biological Rhythm Research	10.1080/09291016.2016.1228573
da Cruz A.R., Rodrigues D.F., de Mello M.T., Simim M.A.M., Rosa J.P.P., Winckler C., Silva A.	Perception of sleep and quality of life in paralympic athletes: Comparison between athletes with physical and visual disabilities [Percepção de qualidade de sono e de vida em atletas paralímpicos: Comparação entre atletas com deficiência física e visual]	2017	Journal of Physical Education (Maringa)	10.4025/JPhysEduc.v28i1.2835
Gomes G.C., Dos Passos M.H.P., Silva H.A., De Oliveira V.M.A., Novaes W.A., Pitangui A.C.R., De Araújo R.C.	Sleep quality and its association with psychological symptoms in adolescent athletes	2017	Revista Paulista de Pediatria	10.1590/1984.0462/;2017;35;3;00009
Luyster F.S., Dunn R.E., Lauderdale D.S., Carnethon M.R., Tucker A.M., Vogel R.A., Lincoln A.E., Knutson K.L., Pellman E.J., Strollo P.J., Jr.	Sleep-apnea risk and subclinical atherosclerosis in early-middle-aged retired National Football League players	2017	Nature and Science of Sleep	10.2147/NSS.S125228
Chase J.D., Roberson P.A., Saunders M.J., Hargens T.A., Womack C.J., Luden N.D.	One night of sleep restriction following heavy exercise impairs 3-km cycling time-trial performance in the morning	2017	Applied Physiology, Nutrition and Metabolism	10.1139/apnm-2016-0698
Tsunoda K., Mutsuzaki H., Hotta K., Shimizu Y., Kitano N., Wadano Y.	Correlation between sleep and psychological mood states in female wheelchair basketball players on a Japanese national team	2017	Journal of Physical Therapy Science	10.1589/jpts.29.1497
Litwic-Kaminska K., Kotyśko M.	Comparison of good and poor sleepers: Stress and life satisfaction of university athletes	2017	Revista de Psicologia del Deporte
Pitchford N.W., Robertson S.J., Sargent C., Cordy J., Bishop D.J., Bartlett J.D.	Sleep quality but not quantity altered with a change in training environment in elite Australian rules football players	2017	International Journal of Sports Physiology and Performance	10.1123/ijspp.2016-0009
Driller M.W., Argus C.K.	Flotation restricted environmental stimulation therapy and napping on mood state and muscle soreness in elite athletes: A novel recovery strategy?	2016	Performance Enhancement and Health	10.1016/j.peh.2016.08.002
Andrade A., Bevilacqua G.G., Coimbra D.R., Pereira F.S., Brandt R.	Sleep quality, mood and performance: A study of elite Brazilian volleyball athletes	2016	Journal of Sports Science and Medicine
Suppiah H.T., Low C.Y., Chia M.	Effects of sport-specific training intensity on sleep patterns and psychomotor performance in adolescent athletes	2016	Pediatric Exercise Science	10.1123/pes.2015-0205
Kawada T.	STOP-BANG questionnaire to screen sleep-disordered breathing for football players: Methodological validity	2016	Respiratory Care	10.4187/respcare.04955
Dobrosielski D.A.	STOP-BANG questionnaire to screen sleep-disordered breathing for football players: Methodological validity—Reply	2016	Respiratory Care	10.4187/respcare.05303
Swinbourne R., Gill N., Vaile J., Smart D.	Prevalence of poor sleep quality, sleepiness and obstructive sleep apnoea risk factors in athletes	2016	European Journal of Sport Science	10.1080/17461391.2015.1120781
Fowler P.M., Duffield R., Lu D., Hickmans J.A., Scott T.J.	Effects of long-haul transmeridian travel on subjective jet-lag and self-reported sleep and upper respiratory symptoms in professional rugby league players	2016	International Journal of Sports Physiology and Performance	10.1123/ijspp.2015-0542
Koikawa N., Shimada S., Suda S., Murata A., Kasai T.	Sex differences in subjective sleep quality, sleepiness, and health-related quality of life among collegiate soccer players	2016	Sleep and Biological Rhythms	10.1007/s41105-016-0068-4
Sargent C., Lastella M., Halson S.L., Roach G.D.	The validity of activity monitors for measuring sleep in elite athletes	2016	Journal of Science and Medicine in Sport	10.1016/j.jsams.2015.12.007
Silva M.-R.G., Pascoal A., Silva H.-H., Paiva T.	Assessing sleep, travelling habits and jet lag in kite surfers according to competition level	2016	Biological Rhythm Research	10.1080/09291016.2016.1181233
Kaier E., Zanotti D., Davis J.L., Strunk K., DeMarni Cromer L.	Addressing the problem of student-athlete sleepiness: Feasibility of implementing an interactive sleep workshop at a division I school	2016	Journal of Clinical Sport Psychology	10.1123/jcsp.2015-0023
Dobrosielski D.A., Nichols D., Ford J., Watts A., Wilder J.N., Douglass-Burton T.	Estimating the prevalence of sleep-disordered breathing among collegiate football players	2016	Respiratory Care	10.4187/respcare.04520
Silva M.R.G., Paiva T.	Poor precompetitive sleep habits, nutrients’ deficiencies, inappropriate body composition and athletic performance in elite gymnasts	2016	European Journal of Sport Science	10.1080/17461391.2015.1103316
Fullagar H.H.K., Skorski S., Duffield R., Julian R., Bartlett J., Meyer T.	Impaired sleep and recovery after night matches in elite football players	2016	Journal of Sports Sciences	10.1080/02640414.2015.1135249
Suppiah H.T., Low C.Y., Choong G.C.W., Chia M.	Restricted and unrestricted sleep schedules of Asian adolescent, high-level student athletes: effects on sleep durations, marksmanship and cognitive performance	2016	Biological Rhythm Research	10.1080/09291016.2016.1151102
Sargent C., Roach G.D.	Sleep duration is reduced in elite athletes following night-time competition	2016	Chronobiology International	10.3109/07420528.2016.1167715
Mintzer D.N., Shargal E., Fuxman Y., Wissblat D., Baharav A.	SLEEP OF ELITE YOUNG ATHLETE AT THE ACADEMY FOR SPORT EXCELLENCE AT THE WINGATE INSTITUTE	2016	Harefuah
Fullagar H., Skorski S., Duffield R., Meyer T.	The effect of an acute sleep hygiene strategy following a late-night soccer match on recovery of players	2016	Chronobiology International	10.3109/07420528.2016.1149190
Arias P., Madinabeitia-Mancebo E., Santiago M., Bergantiño Y.C.-S., Robles-García V.	Effects of early or late-evening fatiguing physical activity on sleep quality in non-professional sportsmen	2016	Journal of Sports Medicine and Physical Fitness
Eagles A.N., Lovell D.I.	Changes in sleep quantity and efficiency in professional rugby union players during home-based training and match play	2016	Journal of Sports Medicine and Physical Fitness
Sufrinko A., Johnson E.W., Henry L.C.	The influence of sleep duration and sleep-related symptoms on baseline neurocognitive performance among male and female high school athletes	2016	Neuropsychology	10.1037/neu0000250
Romyn G., Robey E., Dimmock J.A., Halson S.L., Peeling P.	Sleep, anxiety and electronic device use by athletes in the training and competition environments	2016	European Journal of Sport Science	10.1080/17461391.2015.1023221
Halson S.L.	Stealing sleep: Is sport or society to blame?	2016	British Journal of Sports Medicine	10.1136/bjsports-2015-094961
Samuels C., James L., Lawson D., Meeuwisse W.	The Athlete Sleep Screening Questionnaire: A new tool for assessing and managing sleep in elite athletes	2016	British Journal of Sports Medicine	10.1136/bjsports-2014-094332
Taylor L., Chrismas B.C.R., Dascombe B., Chamari K., Fowler P.M.	The importance of monitoring sleep within adolescent athletes: Athletic, academic, and health considerations	2016	Frontiers in Physiology	10.3389/fphys.2016.00101
Chennaoui M., Bougard C., Drogou C., Langrume C., Miller C., Gomez-Merino D., Vergnoux F.	Stress biomarkers, mood states, and sleep during a major competition: "Success" and "failure" athlete's profile of high-level swimmers	2016	Frontiers in Physiology	10.3389/fphys.2016.00094
Taylor L., Chrismas B.C.R., Dascombe B., Chamari K., Fowler P.M.	Sleep medication and athletic performance-The evidence for practitioners and future research directions	2016	Frontiers in Physiology	10.3389/fphys.2016.00083
Marshall G.J.G., Turner A.N.	The importance of sleep for athletic performance	2016	Strength and Conditioning Journal	10.1519/SSC.0000000000000189
Dennis J., Dawson B., Heasman J., Rogalski B., Robey E.	Sleep patterns and injury occurrence in elite Australian footballers	2016	Journal of Science and Medicine in Sport	10.1016/j.jsams.2015.02.003
Kölling S., Steinacker J.M., Endler S., Ferrauti A., Meyer T., Kellmann M.	The longer the better: Sleep-wake patterns during preparation of the World Rowing Junior Championships	2016	Chronobiology International	10.3109/07420528.2015.1118384
Demirel H.	Sleep quality differs between athletes and non-athletes	2016	Clinical and Investigative Medicine
Kölling S., Ferrauti A., Pfeiffer M., Meyer T., Kellmann M.	Sleep in sports: A short summary of alterations in sleep/wake patterns and the effects of sleep loss and jet-lag [Schlaf im sport: Eine kurze zusammenfassung über veränderungen im schlafverhalten und den einfluss von schlafmangel und jet-lag]	2016	Deutsche Zeitschrift fur Sportmedizin	10.5960/dzsm.2016.215
Fullagar H.H.K., Duffield R., Skorski S., White D., Bloomfield J., Kölling S., Meyer T.	Sleep, travel, and recovery responses of national footballers during and after long-haul international air travel	2016	International Journal of Sports Physiology and Performance	10.1123/ijspp.2015-0012
Lastella M., Roach G.D., Halson S.L., Martin D.T., West N.P., Sargent C.	The impact of a simulated grand tour on sleep, mood, and well-being of competitive cyclists	2015	Journal of Sports Medicine and Physical Fitness
Harris A., Gundersen H., Mørk-Andreassen P., Thun E., Bjorvatn B., Pallesen S.	Restricted use of electronic media, sleep, performance, and mood in high school athletes-a randomized trial	2015	Sleep Health	10.1016/j.sleh.2015.09.011
Shearer D.A., Jones R.M., Kilduff L.P., Cook C.J.	Effects of competition on the sleep patterns of elite rugby union players	2015	European Journal of Sport Science	10.1080/17461391.2015.1053419
Nédélec M., Halson S., Delecroix B., Abaidia A.-E., Ahmaidi S., Dupont G.	Sleep Hygiene and Recovery Strategies in Elite Soccer Players	2015	Sports Medicine	10.1007/s40279-015-0377-9
Schwartz J., Simon R.D.	Sleep extension improves serving accuracy: A study with college varsity tennis players	2015	Physiology and Behavior	10.1016/j.physbeh.2015.08.035
Nédélec M., Halson S., Abaidia A.-E., Ahmaidi S., Dupont G.	Stress, Sleep and Recovery in Elite Soccer: A Critical Review of the Literature	2015	Sports Medicine	10.1007/s40279-015-0358-z
Thun E., Bjorvatn B., Flo E., Harris A., Pallesen S.	Sleep, circadian rhythms, and athletic performance	2015	Sleep Medicine Reviews	10.1016/j.smrv.2014.11.003
Afriani Y., Puspaningtyas D.E., Mahfida S.L., Kushartanti W., Farmawati A.	Quality of sleep affects the level of anxiety and performance of football athletes	2015	Iranian Journal of Public Health
Kostyun R.O., Milewski M.D., Hafeez I.	Sleep disturbance and neurocognitive function during the recovery from a sport-related concussion in adolescents	2015	American Journal of Sports Medicine	10.1177/0363546514560727
Fullagar H.H.K., Skorski S., Duffield R., Hammes D., Coutts A.J., Meyer T.	Sleep and Athletic Performance: The Effects of Sleep Loss on Exercise Performance, and Physiological and Cognitive Responses to Exercise	2015	Sports Medicine	10.1007/s40279-014-0260-0
Jaffee M.S., Winter W.C., Jones C.C., Ling G.	Sleep disturbances in athletic concussion	2015	Brain Injury	10.3109/02699052.2014.983978
Aguero S.D., Jofre P.A., Standen C.V., Herrera-Valenzuela T., Cantillana C.M., Robledo R.P., Valdes-Badilla P.	Sleep quality, excessive daytime sleepiness and insomnia in chilean paralympic athletes [Calidad del sueno, somnolencia e insomnio en deportistas paralimpicos de elite chilenos]	2015	Nutricion Hospitalaria	10.3305/nh.2015.32.6.9893
Arshadi S., Banaeyfar A., Gohari R., Shakibatabar R.	Effects of sleep deprivation and anaerobic exercises on the serum levels of cortisol and IgA in male athletes	2015	Scientific Journal of Kurdistan University of Medical Sciences
Fullagar H.H.K., Duffield R., Skorski S., Coutts A.J., Julian R., Meyer T.	Sleep and recovery in team sport: Current sleep-related issues facing professional team-sport athletes	2015	International Journal of Sports Physiology and Performance	10.1123/ijspp.2014-0565
Fowler P., Duffield R., Howle K., Waterson A., Vaile J.	Effects of northbound long-haul international air travel on sleep quantity and subjective jet lag and wellness in professional Australian soccer players	2015	International Journal of Sports Physiology and Performance	10.1123/ijspp.2014-0490
Rodrigues D.F., Silva A., Rosa J.P.P., Ruiz F.S., Veríssimo A.W., Winckler C., Da Rocha E.A., Parsons A., Tufik S., De Mello M.T.	Sleep quality and psychobiological aspects of Brazilian Paralympic athletes in the London 2012 pre-Paralympics period	2015	Motriz. Revista de Educacao Fisica	10.1590/S1980-65742015000200007
Mejri M.A., Hammouda O., Yousfi N., Zouaoui K., Ben Rayana M.C., Chaouachi A., Driss T., Souissi N.	One night of partial sleep deprivation affects biomarkers of cardiac damage, but not cardiovascular and lipid profiles, in young athletes	2015	Biological Rhythm Research	10.1080/09291016.2015.1048951
Souissi M., Abedelmalek S., Bou Dhiba D., Theodoros Nikolaidis P., Ben Awicha H., Chtourou H., Sahnoun Z.	Morning caffeine ingestion increases cognitive function and short-term maximal performance in footballer players after partial sleep deprivation	2015	Biological Rhythm Research	10.1080/09291016.2015.1034975
Suppiah H.T., Low C.Y., Chia M.	Effects of sports training on sleep characteristics of Asian adolescent athletes	2015	Biological Rhythm Research	10.1080/09291016.2015.1026673
Lastella M., Roach G.D., Halson S.L., Sargent C.	Sleep/wake behaviours of elite athletes from individual and team sports	2015	European Journal of Sport Science	10.1080/17461391.2014.932016
Fowler P., Duffield R., Vaile J.	Effects of simulated domestic and international air travel on sleep, performance, and recovery for team sports	2015	Scandinavian Journal of Medicine and Science in Sports	10.1111/sms.12227
Kostyun R.	Sleep disturbances in concussed athletes: A review of the literature	2015	Connecticut Medicine
Sufrinko A., Pearce K., Elbin R.J., Covassin T., Johnson E., Collins M., Kontos A.P.	The effect of preinjury sleep difficulties on neurocognitive impairment and symptoms after sport-related concussion	2015	American Journal of Sports Medicine	10.1177/0363546514566193
Esteves A.M., Silva A., Barreto A., Cavagnolli D.A., Ortega L.S.A., Parsons A., Tubiba E.R., Barreto M., de Oliveira Filho C.W., Tufik S., de Mello M.T.	Evaluation of the quality of life and sleep in brazilian paralympic athletes [Avaliação da qualidade de vida e do sono de atletas paralímpicos brasileiros] [Evaluación de la calidad de vida y sueño de atletas paralímpicos brasileños]	2015	Revista Brasileira de Medicina do Esporte	10.1590/1517-86922015210101980
Lastella M., Roach G.D., Halson S.L., Martin D.T., West N.P., Sargent C.	Sleep/wake behaviour of endurance cyclists before and during competition	2015	Journal of Sports Sciences	10.1080/02640414.2014.942690
Juliff L.E., Halson S.L., Peiffer J.J.	Understanding sleep disturbance in athletes prior to important competitions	2015	Journal of Science and Medicine in Sport	10.1016/j.jsams.2014.02.007
Petit E., Mougin F., Bourdin H., Tio G., Haffen E.	Impact of 5-h phase advance on sleep architecture and physical performance in athletes	2014	Applied Physiology, Nutrition and Metabolism	10.1139/apnm-2013-0531
Jarraya S., Jarraya M., Chtourou H., Souissi N.	Effect of time of day and partial sleep deprivation on the reaction time and the attentional capacities of the handball goalkeeper	2014	Biological Rhythm Research	10.1080/09291016.2013.787685
Petit E., Mougin F., Bourdin H., Tio G., Haffen E.	A 20-min nap in athletes changes subsequent sleep architecture but does not alter physical performances after normal sleep or 5-h phase-advance conditions	2014	European Journal of Applied Physiology	10.1007/s00421-013-2776-7
McClure D.J., Zuckerman S.L., Kutscher S.J., Gregory A.J., Solomon G.S.	Baseline neurocognitive testing in sports-related concussions: The importance of a prior night's sleep	2014	American Journal of Sports Medicine	10.1177/0363546513510389
Mejri M.A., Hammouda O., Zouaoui K., Chaouachi A., Chamari K., Rayana M.C.B., Souissi N.	Effect of two types of partial sleep deprivation on Taekwondo players performance during intermittent exercise	2014	Biological Rhythm Research	10.1080/09291016.2013.787686
Miller B., O’Connor H., Orr R., Ruell P., Cheng H.L., Chow C.M.	Combined caffeine and carbohydrate ingestion: effects on nocturnal sleep and exercise performance in athletes	2014	European Journal of Applied Physiology	10.1007/s00421-014-2973-z
Sargent C., Lastella M., Halson S.L., Roach G.D.	The impact of training schedules on the sleep and fatigue of elite athletes	2014	Chronobiology International	10.3109/07420528.2014.957306
Lastella M., Roach G.D., Halson S.L., Gore C.J., Garvican-Lewis L.A., Sargent C.	The effects of transmeridian travel and altitude on sleep: Preparation for football competition	2014	Journal of Sports Science and Medicine
Halson S.L.	Sleep in elite athletes and nutritional interventions to enhance sleep	2014	Sports Medicine	10.1007/s40279-014-0147-0
Poussel M., Laure P., Genest J., Fronzaroli E., Renaud P., Favre A., Chenuel B.	Sleep and academic performance in young elite athletes [Sommeil et résultats scolaires chez les jeunes sportifs de haut niveau]	2014	Archives de Pediatrie	10.1016/j.arcped.2014.04.016
Robey E., Dawson B., Halson S., Gregson W., Goodman C., Eastwood P.	Sleep quantity and quality in elite youth soccer players: A pilot study	2014	European Journal of Sport Science	10.1080/17461391.2013.843024
Abeln V., Kleinert J., Strüder H.K., Schneider S.	Brainwave entrainment for better sleep and post-sleep state of young elite soccer players - A pilot study	2014	European Journal of Sport Science	10.1080/17461391.2013.819384
Hausswirth C., Louis J., Aubry A., Bonnet G., Duffield R., Le Meur Y.	Evidence of disturbed sleep and increased illness in overreached endurance athletes	2014	Medicine and Science in Sports and Exercise	10.1249/MSS.0000000000000177
Duffield R., Murphy A., Kellett A., Reid M.	Recovery from repeated on-court tennis sessions: Combining cold-water immersion, compression, and sleep interventions	2014	International Journal of Sports Physiology and Performance	10.1123/IJSPP.2012-0359
Milewski M.D., Skaggs D.L., Bishop G.A., Pace J.L., Ibrahim D.A., Wren T.A.L., Barzdukas A.	Chronic lack of sleep is associated with increased sports injuries in adolescent athletes	2014	Journal of Pediatric Orthopaedics	10.1097/BPO.0000000000000151
Lastella M., Lovell G.P., Sargent C.	Athletes' precompetitive sleep behaviour and its relationship with subsequent precompetitive mood and performance	2014	European Journal of Sport Science	10.1080/17461391.2012.660505
Benton M.L., Friedman N.S.	Treatment of obstructive sleep apnea syndrome with nasal positive airway pressure improves golf performance	2013	Journal of Clinical Sleep Medicine	10.5664/jcsm.3256
Roach G.D., Schmidt W.F., Aughey R.J., Bourdon P.C., Soria R., Jimenez Claros J.C., Garvican-Lewis L.A., Buchheit M., Simpson B.M., Hammond K., Kley M., Wachsmuth N., Gore C.J., Sargent C.	The sleep of elite athletes at sea level and high altitude: A comparison of sea-level natives and high-altitude natives (ISA3600)	2013	British Journal of Sports Medicine	10.1136/bjsports-2013-092843
Sargent C., Roach G.D., Schmidt W.F., Kley M., Wachsmuth N., Hammond K., Aughey R.J., Bourdon P.C., Buchheit M., Simpson B.M., Soria R., Jimenez Claros J.C., Garvican-Lewis L.A., Gore C.J.	The impact of altitude on the sleep of young elite soccer players (isa3600)	2013	British Journal of Sports Medicine	10.1136/bjsports-2013-092829
Bird S.P.	Sleep, recovery, and athletic performance: A brief review and recommendations	2013	Strength and Conditioning Journal	10.1519/SSC.0b013e3182a62e2f
McClure D.J., Zuckerman S.L., Kutscher S.J., Gregory A., Solomon G.S.	Baseline neurocognitive test results in non-concussed athletes: Does sleep matter?	2013	Orthopaedic Journal of Sports Medicine	10.1177/2325967113S00028
Souissi N., Chtourou H., Aloui A., Hammouda O., Dogui M., Chaouachi A., Chamari K.	Effects of time-of-day and partial sleep deprivation on short-term maximal performances of judo competitors	2013	Journal of Strength and Conditioning Research	10.1519/JSC.0b013e31827f4792
Reyner L.A., Horne J.A.	Sleep restriction and serving accuracy in performance tennis players, and effects of caffeine	2013	Physiology and Behavior	10.1016/j.physbeh.2013.07.002
Hoshikawa M., Suzuki Y., Oriishi M.	Effects of normobaric hypoxia equivalent to 2,000-m altitude on sleep and physiological conditions of athletes: A study using sheet-type sensor	2013	Journal of Strength and Conditioning Research	10.1519/JSC.0b013e318295d338
Jarraya M., Jarraya S., Chtourou H., Souissi N., Chamari K.	The effect of partial sleep deprivation on the reaction time and the attentional capacities of the handball goalkeeper	2013	Biological Rhythm Research	10.1080/09291016.2012.721589
Skein M., Duffield R., Minett G.M., Snape A., Murphy A.	The effect of overnight sleep deprivation after competitive rugby league matches on postmatch physiological and perceptual recovery	2013	International Journal of Sports Physiology and Performance	10.1123/ijspp.8.5.556
Schlarb A.A., Schwedler V., Feichtinger P.	Late night sport, sleep, sleep hygiene and mental well-being in adolescent footballers: A pilot study [Spätabendlicher Sport, Schlaf, Schlafhygiene und psychisches Wohlbefinden bei adoleszenten Fußballern: Eine Pilotstudie]	2012	Somnologie	10.1007/s11818-012-0572-y
Roky R., Herrera C.P., Ahmed Q.	Sleep in athletes and the effects of Ramadan	2012	Journal of Sports Sciences	10.1080/02640414.2012.693622
Herrera C.P.	Total sleep time in Muslim football players is reduced during Ramadan: A pilot study on the standardized assessment of subjective sleep-wake patterns in athletes	2012	Journal of Sports Sciences	10.1080/02640414.2012.676666
Venter R.E.	Role of sleep in performance and recovery of athletes: A review article	2012	South African Journal for Research in Sport, Physical Education and Recreation
Nakhostin-Roohi B., Barmaki S.	Nutritional, sleep and exercise patterns of athletes in Ramadan	2012	Gazzetta Medica Italiana Archivio per le Scienze Mediche
Leeder J., Glaister M., Pizzoferro K., Dawson J., Pedlar C.	Sleep duration and quality in elite athletes measured using wristwatch actigraphy	2012	Journal of Sports Sciences	10.1080/02640414.2012.660188
Silva A., Queiroz S.S., Winckler C., Vital R., Sousa R.A., Fagundes V., Tufik S., De Mello M.T.	Sleep quality evaluation, chronotype, sleepiness and anxiety of Paralympic Brazilian athletes: Beijing 2008 paralympic games	2012	British Journal of Sports Medicine	10.1136/bjsm.2010.077016
Zhao J., Tian Y., Nie J., Xu J., Liu D.	Red light and the sleep quality and endurance performance of chinese female basketball players	2012	Journal of Athletic Training	10.4085/1062-6050-47.6.08
Taheri M., Arabameri E.	The effect of sleep deprivation on choice Reaction time and anaerobic power of college student athletes	2012	Asian Journal of Sports Medicine	10.5812/asjsm.34719
Ertuǧrul Öztürk M.	The effects of unilateral nostril breathing during the night on heart rate and sleep apnea in young sportsmen	2012	Neurology Psychiatry and Brain Research	10.1016/j.npbr.2011.12.002
Knechtle B., Wirth A., Knechtle P., Rüst C.A., Rosemann T., Lepers R.	No improvement in race performance by naps in male ultra-endurance cyclists in a 600-km ultra-cycling race	2012	Chinese Journal of Physiology	10.4077/CJP.2012.BAA022
Singh R., Hwa O.C., Roy J., Jin C.W., Ismail S.M., Lan M.F., Hiong L.L., Aziz A.-R.	Subjective perception of sports performance, training, sleep and dietary patterns of Malaysian junior Muslim athletes during Ramadan intermittent fasting	2011	Asian Journal of Sports Medicine	10.5812/asjsm.34750
Mah C.D., Mah K.E., Kezirian E.J., Dement W.C.	The effects of sleep extension on the athletic performance of collegiate basketball players	2011	Sleep	10.5665/SLEEP.1132
Erlacher D., Ehrlenspiel F., Adegbesan O.A., El-Din H.G.	Sleep habits in German athletes before important competitions or games	2011	Journal of Sports Sciences	10.1080/02640414.2011.565782
George C.F.P., Kab V.	Sleep-disordered breathing in the National Football League is not a trivial matter	2011	Sleep	10.1093/sleep/34.3.245
Engle-Friedman M., Palencar V., Riela S.	Sleep and effort in adolescent athletes	2010	Journal of Child Health Care	10.1177/1367493510362129
Albuquerque F.N., Sert Kuniyoshi F.H., Calvin A.D., Sierra-Johnson J., Romero-Corral A., Lopez-Jimenez F., George C.F., Rapoport D.M., Vogel R.A., Khandheria B., Goldman M.E., Roberts A., Somers V.K.	Sleep-disordered breathing, hypertension, and obesity in retired national football league players	2010	Journal of the American College of Cardiology	10.1016/j.jacc.2010.03.099
Rice T.B., Dunn R.E., Lincoln A.E., Tucker A.M., Vogel R.A., Heyer R.A., Yates A.P., Wilson P.W.F., Pellmen E.J., Allen T.W., Newman A.B., Strollo Jr. P.J.	Sleep-disordered breathing in the National Football League	2010	Sleep	10.1093/sleep/33.6.819
Hoshikawa M., Uchida S., Sugo T., Kumai Y., Hanai Y., Kawahara T.	Sleep quality in athletes under normobaric hypoxia equivalent to 1500 m altitude: A polysomnographic study	2010	European Journal of Sport Science	10.1080/17461390903470020
Brand S., Beck J., Gerber M., Hatzinger M., Holsboer-Trachsler E.	Evidence of favorable sleep-EEG patterns in adolescent male vigorous football players compared to controls	2010	World Journal of Biological Psychiatry	10.3109/15622970903079820
Brand S., Gerber M., Beck J., Hatzinger M., Pühse U., Holsboer-Trachsler E.	High Exercise Levels Are Related to Favorable Sleep Patterns and Psychological Functioning in Adolescents: A Comparison of Athletes and Controls	2010	Journal of Adolescent Health	10.1016/j.jadohealth.2009.06.018
Brand S., Beck J., Gerber M., Hatzinger M., Holsboer-Trachsler E.	Football is good for your sleep: Favorable sleep patterns and psychological functioning of adolescent male intense football players compared to controls	2009	Journal of Health Psychology	10.1177/1359105309342602
Dickinson R.K., Hanrahan S.J.	An investigation of subjective sleep and fatigue measures for use with elite athletes	2009	Journal of Clinical Sport Psychology	10.1123/jcsp.3.3.244
Fietze I., Strauch J., Holzhausen M., Glos M., Theobald C., Lehnkering H., Penzel T.	Sleep quality in professional ballet dancers	2009	Chronobiology International	10.1080/07420520903221319
Azboy O., Kaygisiz Z.	Effects of sleep deprivation on cardiorespiratory functions of the runners and volleyball players during rest and exercise	2009	Acta Physiologica Hungarica	10.1556/APhysiol.96.2009.1.3
Davenne D.	Sleep of athletes - Problems and possible solutions	2009	Biological Rhythm Research	10.1080/09291010802067023
Gosselin N., Lassonde M., Petit D., Leclerc S., Mongrain V., Collie A., Montplaisir J.	Sleep following sport-related concussions	2009	Sleep Medicine	10.1016/j.sleep.2007.11.023
Samuels C.	Sleep, Recovery, and Performance: The New Frontier in High-Performance Athletics	2008	Neurologic Clinics	10.1016/j.ncl.2007.11.012
Eiholzer U., Meinhardt U., Rousson V., Petrò R., Schlumpf M., Fusch G., Fusch C., Gasser T., Gutzwiller F.	Association between Short Sleeping Hours and Physical Activity in Boys Playing Ice Hockey	2008	Journal of Pediatrics	10.1016/j.jpeds.2008.05.015
Groslambert A., Candau R.B., Millet G.P.	Effect of sleep deprivation on anxiety and perceived fatigue during a one-man Atlantic ocean crossing on a sport Catamaran	2008	Environment and Behavior	10.1177/0013916507300116
Hoshikawa M., Uchida S., Sugo T., Kumai Y., Hanai Y., Kawahara T.	Changes in sleep quality of athletes under normobaric hypoxia equivalent to 2,000-m altitude: A polysomnographic study	2007	Journal of Applied Physiology	10.1152/japplphysiol.00315.2007
Richmond L.K., Dawson B., Stewart G., Cormack S., Hillman D.R., Eastwood P.R.	The effect of interstate travel on the sleep patterns and performance of elite Australian Rules footballers	2007	Journal of Science and Medicine in Sport	10.1016/j.jsams.2007.03.002
Lucidi F., Lombardo C., Russo P.M., Devoto A., Violani C.	Sleep complaints in Italian olympic and recreational athletes	2007	Journal of Clinical Sport Psychology	10.1123/jcsp.1.2.121
Keller J.	As football players get bigger, more of them risk a dangerous sleep disorder	2007	Chronicle of Higher Education
Reilly T., Edwards B.	Altered sleep-wake cycles and physical performance in athletes	2007	Physiology and Behavior	10.1016/j.physbeh.2006.09.017
Hynynen E., Uusitalo A., Konttinen N., Rusko H.	Heart rate variability during night sleep and after awakening in overtrained athletes	2006	Medicine and Science in Sports and Exercise	10.1249/01.mss.0000184631.27641.b5
Kinsman T.A., Gore C.J., Hahn A.G., Hopkins W.C., Hawley J.A., McKenna M.J., Clark S.A., Aughey R.J., Townsend N.E., Chow C.-M.	Sleep in athletes undertaking protocols of exposure to nocturnal simulated altitude at 2650 m	2005	Journal of Science and Medicine in Sport	10.1016/S1440-2440(05)80013-1
Emsellem H.A., Murtagh K.E.	Sleep apnea and sports performance	2005	Clinics in Sports Medicine	10.1016/j.csm.2005.01.002
Leger D., Metlaine A., Choudat D.	Insomnia and sleep disruption: Relevance for athletic performance	2005	Clinics in Sports Medicine	10.1016/j.csm.2004.12.011
Racinais S., Hue O., Blonc S., Le Gallais D.	Effect of sleep deprivation on shuttle run score in middle-aged amateur athletes: Influence of initial score	2004	Journal of Sports Medicine and Physical Fitness
Sanna N., Della Marca C., Bianco M., Palmieri V., Dello Russo A., Pelargonio G., Zeppilli P.	Prolonged asystolia in a young athlete: A case of sinus arrest during REM sleep	2004	International Journal of Sports Medicine	10.1055/s-2004-820940
Richmond L., Dawson B., Hillman D.R., Eastwood P.R.	The effect of interstate travel on sleep patterns of elite Australian Rules footballers	2004	Journal of Science and Medicine in Sport	10.1016/S1440-2440(04)80008-2
Mauvieux B., Gouthière L., Sesboüe B., Davenne D.	Comparative studies of the circadian rhythms and actimetric reflections of sleep of athletes and sedentary workers posted at night [Etudes comparées des rythmes circadiens et reflet actimétrique du sommeil de sportifs et de sédentaires en poste régulier de nuit]	2003	Canadian Journal of Applied Physiology
George C.F.P., Kab V., Levy A.M.	Increased prevalence of sleep-disordered breathing among professional football players [7]	2003	New England Journal of Medicine	10.1056/NEJM200301233480422
Kinsman T.A., Hahn A.G., Gore C.J., Martin D.T., Chow C.-M.	Sleep quality responses to atmospheric variation: Case studies of two elite female cyclists	2003	Journal of Science and Medicine in Sport	10.1016/S1440-2440(03)80269-4
George C.F.P., Kab V., Kab P., Villa J.J., Levy A.M.	Sleep and breathing in professional football players	2003	Sleep Medicine	10.1016/S1389-9457(03)00113-8
Hague J.F.E., Gilbert S.S., Burgess H.J., Ferguson S.A., Dawson D.	A sedentary day: Effects on subsequent sleep and body temperatures in trained athletes	2003	Physiology and Behavior	10.1016/S0031-9384(02)00975-7
Moriguchi T., Shimomitsu T., Odagiri Y., Ichimura S., Fukuda J., Tomoda A.	Circadian changes in urinary bicarbonate, nitric oxide metabolites and pH in female player during handball camp involved in an exercise, rest and sleep cycle	2002	Tohoku Journal of Experimental Medicine	10.1620/tjem.196.281
Hart L.E., Heiman D.L.	Effects of melatonin on nocturnal sleep and athletic performance the next day	2002	Clinical Journal of Sport Medicine	10.1097/00042752-200201000-00018
Cardinali D.P., Bortman G.P., Liotta G., Lloret S.P., Albornoz L.E., Cutrera R.A., Batista J., Gallo P.O.	A multifactorial approach employing melatonin to accelerate resynchronization of sleep-wake cycle after a 12 time-zone westerly transmeridian flight in elite soccer athletes	2002	Journal of Pineal Research	10.1034/j.1600-079x.2002.10820.x
Faigenbaum A.D., Mediate P., Rota D.	Sleep need in high school athletes	2002	Strength and Conditioning Journal	10.1519/00126548-200208000-00005
Walters P.H.	Sleep, the athlete, and performance	2002	Strength and Conditioning Journal	10.1519/00126548-200204000-00005
Kinsman T.A., Hahn A.G., Gore C.J., Wilsmore B.R., Martin D.T., Chow C.-M.	Respiratory events and periodic breathing in cyclists sleeping at 2,650-m simulated altitude	2002	Journal of Applied Physiology	10.1152/japplphysiol.00737.2001
Kinsman T.A.	Respiratory disturbance, periodic breathing and the heart rates of cyclists sleeping at a simulated moderate altitude (sma) of 2650m. '	2001	Respirology
Atkinson G., Buckley P., Edwards B., Reilly T., Waterhouse J.	Are there hangover-effects on physical performance when melatonin is ingested by athletes before nocturnal sleep?	2001	International Journal of Sports Medicine	10.1055/s-2001-16387
Netzer N.C., Kristo D., Steinle H., Lehmann M., Strohl K.P.	REM sleep and catecholamine excretion: A study in elite athletes	2001	European Journal of Applied Physiology	10.1007/s004210100383
Callard D., Gauthier A., Maffiuletti N., Davenne D., Van Hoecke J.	Circadian fluctuations in the muscular efficiency of athletes: with sleep versus sleep deprivation [Fluctuations nycthémérales des capacités musculaires chez l'homme sportif: avec sommeil versus en privation de sommeil.]	2000	Journal de la Société de biologie
Ashenden M.J., Hahn A.G., Gore C.J., Dobson G.P.	'Live high, train low' does not change the total haemoglobin mass of male endurance athletes sleeping at a simulated altitude of 3000 m for 23 nights	1999	European Journal of Applied Physiology and Occupational Physiology	10.1007/s004210050621
Savis J.C., Eliot J.F., Gansneder B., Rotella R.J.	A subjective means of assessing college athletes' sleep: A modification of the morningness/eveningness questionnaire	1997	International Journal of Sport Psychology
Seo Y.J., Matsumoto K., Mohri M., Park Y.M., Matsuoka S.	Effects on sleep patterns during simulated oxygen-helium saturation diving at 180 and 230 m.	1997	Journal of human ergology	10.11183/jhe1972.26.61
Zimmermann E.	Sleep and performance in athletes [Leistung und Schlaf bei Sportlern]	1996	Wiener Medizinische Wochenschrift
Javierre C., Calvo M., Díez A., Garrido E., Segura R., Ventura J.L.	Influence of sleep and meal schedules on performance peaks in competitive sprinters	1996	International Journal of Sports Medicine	10.1055/s-2007-972869
Montmayeur A., Buguet A., Sollin H., Lacour J.-R.	Exercise and sleep in four African sportsmen living in the Sahel: A pilot study	1994	International Journal of Sports Medicine	10.1055/s-2007-1021018
Reilly T., Piercy M.	The effect of partial sleep deprivation on weight-lifting performance	1994	Ergonomics	10.1080/00140139408963628
Mougin F., Simon-Rigaud M., Davenne D., Renaud A., Garnier A., Magnin P.	Influence of partial sleep deprivation on athletic performance [Influence d'une privation partielle de sommeil sur l'adaptation à l'exercice physique]	1990	Science and Sports	10.1016/S0765-1597(05)80210-2
Weydahl A.	Covariance of daylight, sport participation and sleep patterns.	1990	Progress in clinical and biological research
Walsh B.T., Puig-Antich J., Goetz R., Gladis M., Novacenko H., Glassman A.H.	Sleep and growth hormone secretion in women athletes	1984	Electroencephalography and Clinical Neurophysiology	10.1016/0013-4694(84)90088-9
Morris A.F.	Sleep disturbances in athletes	1982	Physician and Sportsmedicine	10.1080/00913847.1982.11947321
Bale P., White M.	The effects of smoking on the health and sleep of sportswomen.	1982	British journal of sports medicine	10.1136/bjsm.16.3.149
Shapiro C.M.	Sleep and the athlete.	1981	British journal of sports medicine	10.1136/bjsm.15.1.51
Baekeland F., Lasky R.	Exercise and sleep patterns in college athletes.	1966	Perceptual and Motor Skills	10.2466/pms.1966.23.3f.1203
